# Supplementary material
Source: MDPI journal article supplement (https://www.mdpi.com/2075-4701/13/12/2024)
Supplement: s1 [file s1]

# Formation of Complexes of *f*-Elements with Electron-Withdrawing N-Heterocyclic Diamides: Extraction and Solution Photophysics

Nataliya E. Borisova <sup>1,\*</sup>, Anastasiia V. Kharcheva <sup>2</sup>, Kirill D. Shmelkov <sup>2</sup>, Mikhail A. Gerasimov <sup>1</sup>, Mariia V. Evsiunina <sup>1</sup>, Petr I. Matveev <sup>1,\*</sup>, Alexey V. Ivanov <sup>1</sup>, Yulia G. Sokolovskaya <sup>2</sup> and Svetlana V. Patsaeva <sup>2,\*</sup>

<sup>1</sup> Faculty of Chemistry, Lomonosov Moscow State University, Moscow 119991, Russia; gerasimov@radio.chem.msu.ru (M.A.G.); evsiunina@radio.chem.msu.ru (M.V.E.); phthal\_iv@org.chem.msu.ru (A.V.I.)

<sup>2</sup> Faculty of Physics, Lomonosov Moscow State University, Moscow 119991, Russia; harcheva.anastasiya@physics.msu.ru (A.V.K.); vinchester3030@mail.ru (K.D.S.); sokolovskaja.julija@physics.msu.ru (Y.G.S.)

\* Correspondence: nbor@radio.chem.msu.ru (N.E.B.); matveev@radio.chem.msu.ru (P.I.M.); patsaeva@physics.msu.ru (S.V.P.)

## Content

|                                                                               |   |
|-------------------------------------------------------------------------------|---|
| UV-vis titration data in CH <sub>3</sub> CN .....                             | 2 |
| Ligand 6Me2Py with Eu(NO <sub>3</sub> ) <sub>3</sub> ·6H <sub>2</sub> O ..... | 2 |
| Ligand 6Me2Py with Tb(NO <sub>3</sub> ) <sub>3</sub> ·5H <sub>2</sub> O ..... | 2 |
| Ligand 4Py with Eu(NO <sub>3</sub> ) <sub>3</sub> ·6H <sub>2</sub> O .....    | 3 |
| Ligand 4Py with Tb(NO <sub>3</sub> ) <sub>3</sub> ·5H <sub>2</sub> O .....    | 3 |

**Citation:** Borisova, N.E.; Kharcheva, A.V.; Shmelkov, K.D.; Gerasimov, M.A.; Evsiunina, M.V.; Matveev, P.I.; Ivanov, A.V.; Sokolovskaya, Y.G.; Patsaeva, S.V. Formation of Complexes of *f*-Elements with Electron-Withdrawing N-Heterocyclic Diamides: Extraction and Solution Photophysics. *Metals* **2023**, *13*, x. <https://doi.org/10.3390/xxxxx>

Academic Editor: Petros E. Tsakiridis

Received: 8 November 2023

Revised: 8 December 2023

Accepted: 10 December 2023

Published: 18 December 2023

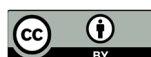

**Copyright:** © 2023 by the authors. Submitted for possible open access publication under the terms and conditions of the Creative Commons Attribution (CC BY) license (<https://creativecommons.org/licenses/by/4.0/>).

## UV-vis titration data in CH<sub>3</sub>CN

### Ligand 6Me2Py with Eu(NO<sub>3</sub>)<sub>3</sub>·6H<sub>2</sub>O

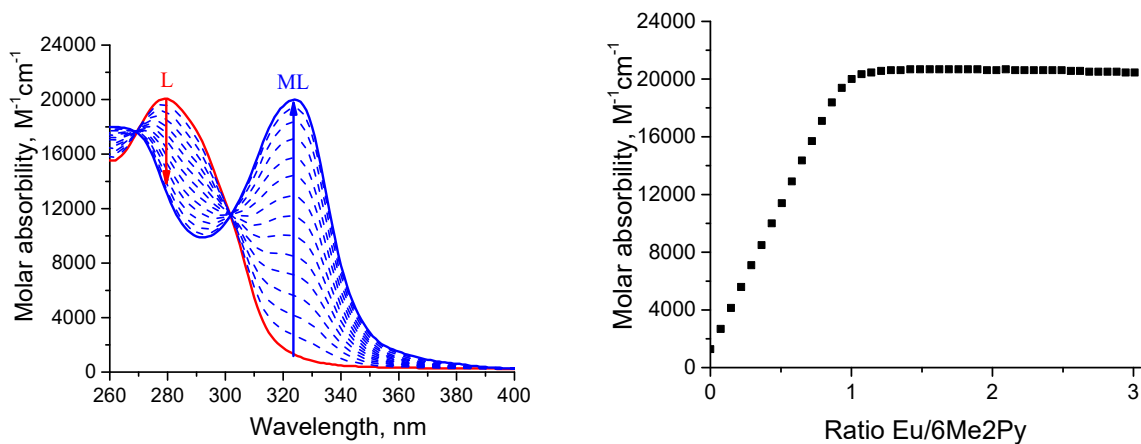

Figure S1. Spectrophotometric titration of 6Me2Py by Eu(NO<sub>3</sub>)<sub>3</sub>·6H<sub>2</sub>O in acetonitrile solution: (left) spectrophotometric data, where red line – ligand spectrum, blue dashed lines – aliquots of Eu(NO<sub>3</sub>)<sub>3</sub>·6H<sub>2</sub>O, blue line – europium complex, (right) titration curve at 323 nm.

### Ligand 6Me2Py with Tb(NO<sub>3</sub>)<sub>3</sub>·5H<sub>2</sub>O

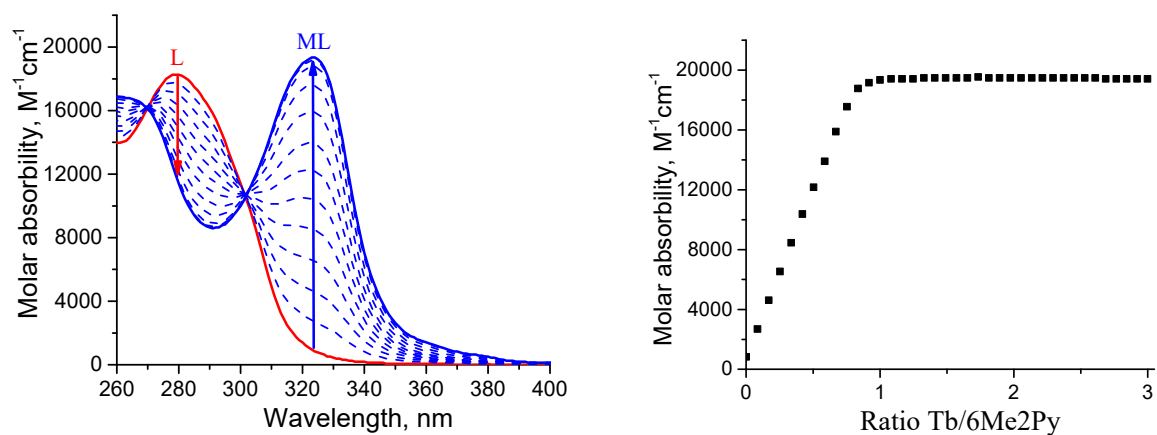

Figure S2. Spectrophotometric titration of 6Me2Py by Tb(NO<sub>3</sub>)<sub>3</sub>·5H<sub>2</sub>O in acetonitrile solution: (left) spectrophotometric data, where red line – ligand spectrum, blue dashed lines – aliquots of Eu(NO<sub>3</sub>)<sub>3</sub>·6H<sub>2</sub>O, blue line – terbium complex, (right) titration curve at 323 nm.

### Ligand 4Py with $\text{Eu}(\text{NO}_3)_3 \cdot 6\text{H}_2\text{O}$

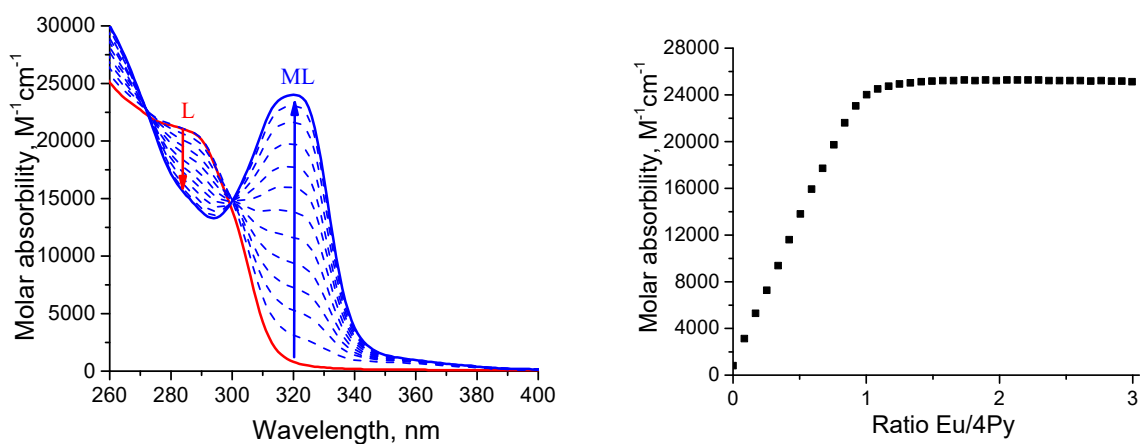

Figure S3. Spectrophotometric titration of 4Py by  $\text{Eu}(\text{NO}_3)_3 \cdot 6\text{H}_2\text{O}$  in acetonitrile solution: (left) spectrophotometric data, where red line – ligand spectrum, blue dashed lines – aliquots of  $\text{Eu}(\text{NO}_3)_3 \cdot 6\text{H}_2\text{O}$ , blue line – europium complex, (right) titration curve at 320 nm.

### Ligand 4Py with $\text{Tb}(\text{NO}_3)_3 \cdot 5\text{H}_2\text{O}$

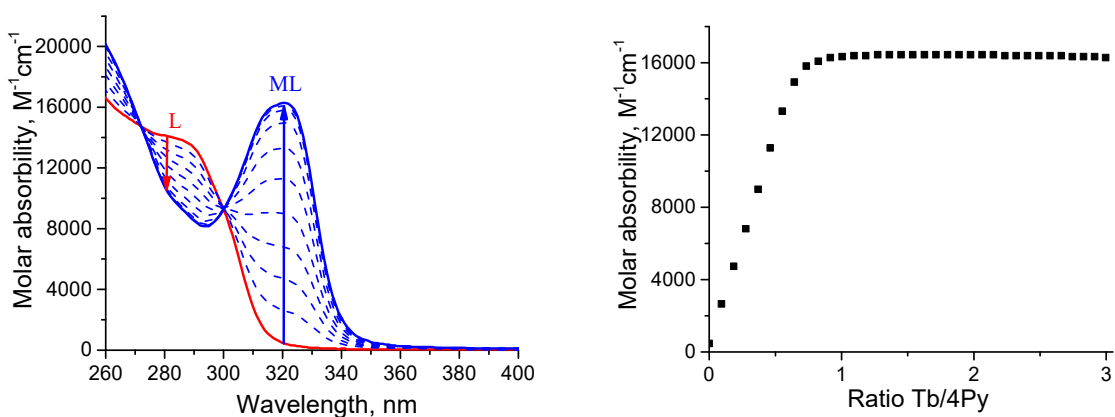

Figure S4. Spectrophotometric titration of 4Py by  $\text{Tb}(\text{NO}_3)_3 \cdot 5\text{H}_2\text{O}$  in acetonitrile solution: (left) spectrophotometric data, where red line – ligand spectrum, blue dashed lines – aliquots of  $\text{Eu}(\text{NO}_3)_3 \cdot 6\text{H}_2\text{O}$ , blue line – terbium complex, (right) titration curve at 321 nm.
